# Supplementary material for: Validation and utilization of an internally controlled multiplex Real-time RT-PCR assay for simultaneous detection of enteroviruses and enterovirus A71 associated with hand foot and mouth disease
Source: PubMed Central journal article supplement (PMC4464700; doi:10.1186/s12985-015-0316-2), 2015-06-09
Supplement: 12985_2015_316_MOESM1_ESM.pdf [file 12985_2015_316_MOESM1_ESM.pdf]

|                                                                         | 3,090                                                                                                                                                                              | 3,100 | 3,110 | 3,120 | 3,130 | 3,140        | 3,150 | 3,160 | 3,170 | 3,180 | 3,190       | 3,200 | 3,210 | 3,220 |  |
|-------------------------------------------------------------------------|------------------------------------------------------------------------------------------------------------------------------------------------------------------------------------|-------|-------|-------|-------|--------------|-------|-------|-------|-------|-------------|-------|-------|-------|--|
| Consensus                                                               | ATA TCCCAC ATT CGGAGA ACACAACAGGAGAAAG ATCTT GAA TAT GGGGCA TGT CC TAA TAA CAT GAT GGG CAC GTTCT CAG TGC GGA CTG TGGGG ACC TCC AAG TCC AAG TAC CC TTT AGT GGT TAG GAT TTA CA       |       |       |       |       |              |       |       |       |       |             |       |       |       |  |
|                                                                         | EV-A71-634F                                                                                                                                                                        |       |       |       |       | EV-A71-probe |       |       |       |       | EV-A71-743R |       |       |       |  |
| Identity                                                                |                                                                                                                                                                                    |       |       |       |       |              |       |       |       |       |             |       |       |       |  |
| 63. JX678885.1/China/Shanghai/SH-17/SH/CHN/2002/C4b/2002 (C4)           | ATA TCC TAC ATT CGG TGA ACACAACAGGAGAAAG ATCTT GAA TAT GGGGCA TGT CC TAA CAA CAT GAT GGG CAC AT TCT CAG TGC GGA CCG TAG GA ACC TCC AAG TCC AAG TAC CC TTT AGT GGT TAG GAT TTA CA   |       |       |       |       |              |       |       |       |       |             |       |       |       |  |
| 64. JQ742002.1/China/AFP2001071/EV71/GX/CHN/2001/C4b/2001 (C4)          | ATACCC CAC ATT CGG TGA ACACAAGCAGGAGAAAG ATCTT GAA TAT GGGGCA TGT CC CAA CAA CAT GAT GGG CAC AT TCT CAG TGC GGA CCG TAG GA ACC TCC AAG TCC AAG TAC CC TTT AGT GGT TAG GAT TTA CA   |       |       |       |       |              |       |       |       |       |             |       |       |       |  |
| 65. GU350629.1/China/Anhui/Fuyang-0805a (C4)                            | ATA TCC TAC ATT CGG TGA ACACAACAGGAGAAAG ATCTT GAA TAT GGGGCA TGT CC TAA CAA CAT GAT GGG TAC AT TCT CAG TGC GGA CCG TAG GA ACC TCC AAG TCC AAG TAC CC TTT AGT GGT TAG GAT TTA CA   |       |       |       |       |              |       |       |       |       |             |       |       |       |  |
| 66. FJ194964.1/China/Guangdong/EV71/GDFS/3/2008/C4b/2008 (C4)           | ATA TCCC AC GTT CGGAGA ACACAACAGGAGAAAG ATCTT GAA TAT GGGGCA TGT CC TAA CAA CAT GAT GGG CAC GT TTT CCG TGC GGA CTG TAG GA ACC TCC AAG TCC AAG TAC CC TTT AGT GGT TAG GAT TTA CA    |       |       |       |       |              |       |       |       |       |             |       |       |       |  |
| 67. GQ994989.1/China/Chongqing/Chongqing1-09-China/2009/C4b/2009 (C4)   | ATA TCCC CAC ATT CGG GGA ACACAACAGGAGAAAG ATCTT GAA TAT GGGGCA TGT CC TAA CAA TAT GAT GGG CAC GT TCT CAG TGC GGA CTG TGG GG ACC TCC AAG TCC AAG TAC CC TTT AGT GGT TAG GAT ATA CA  |       |       |       |       |              |       |       |       |       |             |       |       |       |  |
| 68. HM807310.1/Taiwan/cmuh-050530-5/2005 (C4)                           | ATA TCCC CAC ATT CGGAGA ACACAACAGGAGAAAG ATCTT GAG TAT GGGGCA TGT CC TAA CAA CAT GAT GGG CAC AT TCT CAG TGC GGA CTG TAG GG ACC TCC AAG TCC AAG TAC CC TTT GGT GGT TAG GAT TTA CA   |       |       |       |       |              |       |       |       |       |             |       |       |       |  |
| 69. AY465356.1/China/Shenzhen/SHZH03/C4b/2003 (C4)                      | ATA TCCC CAC ATT CGGAGA ACACAACAGGAGAAAG ATCTT GAA TAT GGGGCA TGT CC TAA CAA CAT GAT GGG CAC GT TCT CAG TGC GGA CTG TAG GA ACC TCC AAA TCC AAG TAC CC TTT GGT GGT TAG GAT TTA CA   |       |       |       |       |              |       |       |       |       |             |       |       |       |  |
| 70. JX678874.1/China/Chongqing/CQ03-1/CQ/CHN/2003/C4b/2003 (C4)         | ATA TCCC CAC ATT CGGAGA ACACAACAGGAGAAAG ATCTT GAA TAT GGGGCA TGT CC TAA CAA CAT GAT GGG CAC GT TCT CAG TGC GGA CTG TAG GA ACC TCC AAG TCC AAG TAC CC TTT AGT GGT TAG GAT TTA CA   |       |       |       |       |              |       |       |       |       |             |       |       |       |  |
| 71. HQ647171.1/Canada/EV141-06/2006/C4a/2006 (C4)                       | ATA TCCC CAC ATT CGGAGA ACACAACAGGAGAAAG ATCTT GAA TAT GGGGCA TGT CC TAA CAA CAT GAT GGG CAC GT TCT CAG TGC GGA CTG TAG GA ACC TCC AAG TCC AAG TAC CC TTT AGT GGT TAG GAT TTA CA   |       |       |       |       |              |       |       |       |       |             |       |       |       |  |
| 72. HQ647180.1/Canada/EV034-06/2006 (C4)                                | ATA TCCC CAC ATT CGGAGA ACACAACAGGAGAAAG ATCTT GAA TAT GGGGCA TGT CC TAA CAA CAT GAT GGG CAC GT TCT CAG TGC GGA CTG TAG GA ACC TCC AAG TCC AAG TAC CC TTT AGT GGT TAG GAT TTA CA   |       |       |       |       |              |       |       |       |       |             |       |       |       |  |
| 73. HQ647179.1/Canada/EV144-06/2006 (C4)                                | ATA TCCC CAC ATT CGGAGA ACACAACAGGAGAAAG ATCTT GAA TAT GGGGCA TGT CC TAA CAA CAT GAT GGG CAC GT TCT CAG TGC GAA CTG TAG GA ACC TCC AAG TCC AAG TAC CC TTT AGT GGT TAG GAT TTA CA   |       |       |       |       |              |       |       |       |       |             |       |       |       |  |
| 74. JX678886.1/China/Shanghai/SH-6/SH/CHN/2002/C4b/2002 (C4)            | ATA TCCC CAC ATT CGGAGA ACACAACAGGAGAAAG ATCTT GAA TAT GGGGCA TGT CC TAA CAA CAT GAT GGG CAC GT TCT CAG TGC GGA CTG TAG GA ACC TCC AAG TCC AAG TAC CC TTT AGT GGT TAG GAT TTA CA   |       |       |       |       |              |       |       |       |       |             |       |       |       |  |
| 75. AB550339.1/Japan/Labstrain/75-Yamagata-LPS1/C4/2003 (C4)            | ATA TCCC CAC ATT CGGAGA ACACAACAGGAGAAAG ATCTT GAA TAT GGGGCA TGT CC TAA CAA CAT GAT GGG CAC GT TCT CAG TGC GGA CTG TAG GA ACC TCC AAG TCC AAG TAC CC TTT AGT GGT TAG GAT TTA CA   |       |       |       |       |              |       |       |       |       |             |       |       |       |  |
| 76. AB550338.1/Japan/75-Yamagata-org/C4/2003 (C4)                       | ATA TCCC CAC ATT CGGAGA ACACAACAGGAGAAAG ATCTT GAA TAT GGGGCA TGT CC TAA CAA CAT GAT GGG CAC GT TCT CAG TGC GGA CTG TAG GA ACC TCC AAG TCC AAG TAC CC TTT AGT GGT TAG GAT TTA CA   |       |       |       |       |              |       |       |       |       |             |       |       |       |  |
| 77. DQ133459.1/Taiwan/1235/C4/2004 (C4)                                 | ATA TCC TAC GTT CGGAGA ACACAACAGGAGAAAG ATCTT GAA TAT GGGGCA TGT CC TAA CAA CAT GAT GGG CAC GT TCT CAG TGC GGA CCG TAG GG ACC TCC AAG TCC AAG TAC CC TTT AGT GGT TAG GAT TTA CA    |       |       |       |       |              |       |       |       |       |             |       |       |       |  |
| 78. DQ133458.1/Taiwan/984/C4/2004 (C4)                                  | ATA TCCC CAC ATT CGGAGA ACACAACAGGAGAAAG ATCTT GAA TAT GGGGCA TGT CC TAA CAA CAT GAT GGG CAC AT TCT CAG TGC GGA CTG TAG GG ACC TCC AAG TCC AAG TAC CC TTT AGT GGT TAG GAT TTA CA   |       |       |       |       |              |       |       |       |       |             |       |       |       |  |
| 79. FJ357373.1/Taiwan/S0584-TW04/C4/2004 (C4)                           | ATA TCCC CAC GTT CGGAGA ACACAACAGGAGAAAG ATCTT GAG TAT GGGGCA TGT CC TAA CAA CAT GAT GGG CAC AT TCT CAG TGC GGA CTG TGG GG ACC TCC AAG TCC AAG TAC CC TTT GGT GGT TAG GAT TTA CA   |       |       |       |       |              |       |       |       |       |             |       |       |       |  |
| 80. EF373576.1/Taiwan/E2004104-TW-CDC (C4)                              | ATA TCCC CAC ATT CGGAGA ACACAACAGGAGAAAG ATCTT GAG TAT GGGGCA TGT CC TAA CAA CAT GAT GGG CAC AT TCT CAG TGC GGA CTG TAG GG ACC TCC AAG TCC AAG TAC CC TTT GGT GGT TAG GAT TTA CA   |       |       |       |       |              |       |       |       |       |             |       |       |       |  |
| 81. GQ231938.1/Taiwan/TW/71552/05 (C4)                                  | ATA TCCC CAC ATT CGGAGA ACACAACAGGAGAAAG ATCTT GAG TAT GGGGCA TGT CC TAA CAA CAT GAT GGG CAC AT TCT CAG TGC GGA CTG TAG GG ACC TCC AAG TCC AAG TAC CC TTT GGT GGT TAG GAT TTA CA   |       |       |       |       |              |       |       |       |       |             |       |       |       |  |
| 82. GQ231926.1/Taiwan/TW/1956/05/C4a/2005 (C4)                          | ATA TCCC CAC ATT CGGAGA ACACAACAGGAGAAAG ATCTT GAA TAT GGGGCA TGT CC TAA CAA CAT GAT GGG CAC AT TCT CAG TGC GGA CTG TAG GG ACC TCC AAG TCC AAG TAC CC TTT GGT GGT TAG GAT TTA CA   |       |       |       |       |              |       |       |       |       |             |       |       |       |  |
| 83. GQ231940.1/Taiwan/TW/72232/04/C4 (C4)                               | ATA TCCC CAC ATT CGGAGA ACACAACAGGAGAAAG ATCTT GAG TAT GGGGCA TGT CC TAA CAA CAT GAT GGG CAC AT TCT CAG TGC GGA CTG TAG GG ACC TCC AAG TCC AAG TAC CC TTT GGT GGT TAG GAT TTA CA   |       |       |       |       |              |       |       |       |       |             |       |       |       |  |
| 84. GQ231937.1/Taiwan/TW/71428/05/C4 (C4)                               | ATA TCCC CAC ATT CGGAGA ACACAACAGGAGAAAG ATCTT GAG TAT GGGGCA TGT CC TAA CAA CAT GAT GGG CAC AT TCT CAG TGC GGA CTG TAG GG ACC TCC AAG TCC AAG TAC CC TTT GGT GGT TAG GAT TTA CA   |       |       |       |       |              |       |       |       |       |             |       |       |       |  |
| 85. GQ231939.1/Taiwan/TW/71595/04/C4 (C4)                               | ATA TCCC CAC ATT CGGAGA ACACAACAGGAGAAAG ATCTT GAG TAT GGGGCA TGT CC TAA CAA CAT GAT GGG CAC AT TCT CAG TGC GGA CTG TAG GG ACC TCC AAG TCC AAG TAC CC TTT GGT GGT TAG GAT TTA CA   |       |       |       |       |              |       |       |       |       |             |       |       |       |  |
| 86. GQ231929.1/Taiwan/TW/2728/04/C4a/2004 (C4)                          | ATA TCCC CAC ATT CGGAGA ACACAACAGGAGAAAG ATCTT GAG TAT GGGGCA TGT CC TAA CAA CAT GAT GGG CAC AT TCT CAG TGC GGA CTG TAG GG ACC TCC AAG TCC AAG TAC CC TTT GGT GGT TAG GAT TTA CA   |       |       |       |       |              |       |       |       |       |             |       |       |       |  |
| 87. FJ357374.1/Taiwan/N2121-TW05/C4/2005 (C4)                           | ATA TCCC CAC ATT CGGAGA ACACAACAGGAGAAAG ATCTT GAG TAT GGGGCA TGT CC TAA CAA TAT GAT GGG CAC AT TCT CAG TGC GGA CTG TAG GG ACC TCC AAG TCC AAG TAC CC TTT GGT GGT TAG GAT TTA CA   |       |       |       |       |              |       |       |       |       |             |       |       |       |  |
| 88. GQ231931.1/Taiwan/TW/2824/04/C4 (C4)                                | ATA TCCC CAC ATT CGGAGA ACACAACAGGAGAAAG ATCTT GAG TAT GGGGCA TGT CC TAA CAA CAT GAT GGG CAC AT TCT CAG TGC GGA CTG TAG GG ACC TCC AAG TCC AAG TAC CC TTT GGT GGT TAG GAT TTA CA   |       |       |       |       |              |       |       |       |       |             |       |       |       |  |
| 89. GQ231928.1/Taiwan/TW/2639/04/C4 (C4)                                | ATA TCCC CAC ATT CGGAGA ACACAACAGGAGAAAG ATCTT GAG TAT GGGGCA TGT CC TAA CAA CAT GAT GGG CAC AT TCT CAG TGC GGA CTG TAG GG ACC TCC AAG TCC AAG TAC CC TTT GGT GGT TAG GAT TTA CA   |       |       |       |       |              |       |       |       |       |             |       |       |       |  |
| 90. GQ231927.1/Taiwan/TW/2429/04/C4 (C4)                                | ATA TCCC CAC ATT CGGAGA ACACAACAGGAGAAAG ATCTT GAG TAT GGGGCA TGT CC TAA CAA CAT GAT GGG CAC AT TCT CAG TGC GGA CTG TAG GG ACC TCC AAG TCC AAG TAC CC TTT GGT GGT TAG GAT TTA CA   |       |       |       |       |              |       |       |       |       |             |       |       |       |  |
| 91. GQ231930.1/Taiwan/TW/2815/04/C4 (C4)                                | ATA TCCC CAC ATT CGGAGA ACACAACAGGAGAAAG ATCTT GAG TAT GGGGCA TGT CC TAA CAA CAT GAT GGG CAC AT TCT CAG TGC GGA CTG TAG GG ACC TCC AAG TCC AAG TAC CC TTT GGT GGT TAG GAT TTA CA   |       |       |       |       |              |       |       |       |       |             |       |       |       |  |
| 92. JQ965759.1/Vietnam/540V/VNM/05/C4/2005 (C4)                         | ATA TCCC CAC ATT CGGAGA ACACAACAGGAGAAAG ATCTT GAG TAT GGGGCA TGT CC TAA CAA CAT GAT GGG CAC AT TCT CAG TGC GGA CTG TAG GG ACC TCC AAG TCC AAG TAC CC TTT GGT GGT TAG GAT TTA CA   |       |       |       |       |              |       |       |       |       |             |       |       |       |  |
| 93. GQ231932.1/Taiwan/TW/2871/04/C4 (C4)                                | ATA TCCC CAC ATT CGGAGA ACACAACAGGAGAAAG ATCTT GAG TAT GGGGCA TGT CC TAA CAA CAT GAT GGG CAC AT TCT CAG TGC GGA CTG TAG GG ACC TCC AAG TCC AAG TAC CC TTT GGT GGT TAG GAT TTA CA   |       |       |       |       |              |       |       |       |       |             |       |       |       |  |
| 94. GQ994992.1/China/Henan/Henan2-09-China/2009/C4a/2009 (C4)           | ATA TCCC CAC ATT CGGAGA ACACAACAGGAGAAAG ATCTT GAG TAT GGGGCA TGT CC TAA TAA CAT GAT GGG CAC GT TCT CAG TGC GGA CTG TAG GG ACC TCC AAG TCC AAG TAC CC TTT AGT GGT TAG GAT TTA CA   |       |       |       |       |              |       |       |       |       |             |       |       |       |  |
| 95. GQ279369.1/China/SZ/HK08-5/2008 (C4)                                | ATA TCCC CAC ATT CGG GGA ACACAACAGGAGAAAG ATCTT GAG TAT GGG GCG TGC CC TAA TAA CAT GAT GGG TAC GT TCT CAG TGC GGA CTG TAG GG ACC TCC AAA TCC AAG TAT CC TTT AGT GGT TAG GAT TTA CA |       |       |       |       |              |       |       |       |       |             |       |       |       |  |
| 96. JX244184.1/China/SDLY48/C/2009 (C4)                                 | ATA TCCC CAC ATT CGGAGA ACACAACAGGAGAAAG ATCTT GAG TAT GGGGCA TGT CC TAA TAA CAT GAT GGG TAC GT TCT CAG TGC GGA CTG TAG GG ACC TCC AAG TCC AAA TAT CC TTT AGT GAT TAG GAT TTA CA   |       |       |       |       |              |       |       |       |       |             |       |       |       |  |
| 97. FJ606447.1/China/Beijing/BJ08-2004-3/2008/C4a/2008 (C4)             | ATA TCCC CAC GTT TGGAGA ACATAACAGGAGAAAG ATCTT GAG TAT GGGGCA TGT CC TAA CAA CAT GAT GGG CAC GT TCT CAG TGC GGA CTG TAG GG ACC TCC AAG TCC AAG TAC CC TTT AGT GGT TAG GAT TTA CA   |       |       |       |       |              |       |       |       |       |             |       |       |       |  |
| 98. JQ681218.1/China/Henan/H8-1/C4a/2008 (C4)                           | ATA TCCC CAC ATT CGGAGA ACACAACAGGAGAAAG ATCTT GAA TAT GGGGCA TGT CC TAA TAA CAT GAT GGG CAC GT TTT CAG TGC GGA CTG TAG GG ACC TCC AAG TCC AAG TAC CC TTT AGT GGT TAG GAT TTA CA   |       |       |       |       |              |       |       |       |       |             |       |       |       |  |
| 99. GU196833.1/China/Henan1-09-China/2009 (C4)                          | ATA TCCC CAC ATT CGGAGA ACACAACAGGAGAAAG ATCTT GAA TAT GGGGCA TGT CC TAA TAA CAT GAT GGG CAC GT TTT CAG TGC GGA CTG TAG GG ACC TCC AAG TCC AAG TAC CC TTT AGT GGT TAG GAT TTA CA   |       |       |       |       |              |       |       |       |       |             |       |       |       |  |
| 100. HQ129932.1/China/BJ06-SJS06/06/C4/2006 (C4)                        | ATA TCCC CAC ATT CGGAGA ACACAACAGGAGAAAG ATCTT GAA TAT GGGGCA TGT CC TAA TAA CAT GAT GGG CAC GT TCT CAG TGC GGA CTG TAG GG ACC TCC AAG TCC AAG TAC CC TTT AGT GGT TAG GAT TTA TA   |       |       |       |       |              |       |       |       |       |             |       |       |       |  |
| 101. FJ607336.1/China/28/SHENZHEN/08/China/HFMD/2008/2008 (C4)          | ATA TCCC CAC ATT CGGAGA ACACAACAGGAGAAAG ATCTT GAA TAT GGGGCA TGT CC TAA TAA CAT GAT GGG CAC GT TCT CAG TGC GGA CTG TAG GG ACC TCC AAG TCC AAG TAC CC TTT AGT GGT TAG GAT TTA CA   |       |       |       |       |              |       |       |       |       |             |       |       |       |  |
| 102. FJ828519.1/China/BJ08/C4/2008 (C4)                                 | ATA TCCC CAC ATT CGGAGA ACACAACAGGAGAAAG ATCTT GAA TAT GGGGTA TGT CC TAA TAA CAT GAT GGG CAC GT TCT CAG TGC GGA CTG TAG GG ACC TCC AAG TCC AAG TAC CC TTT AGT GGT TAG GAT TTA CA   |       |       |       |       |              |       |       |       |       |             |       |       |       |  |
| 103. FJ360545.1/China/GZ-08-02/C4/2008 (C4)                             | ATA TCCC CAC ATT CGGAGA ACACAACAGGAGAAAG ATCTT GAA TAT GGGGCA TGT CC TAA TAA CAT GAT GGG TAC GT TCT CAG TGC GGA CTG TAG GG ACC TCC AAA TCC AAG TAC CC TTT GGT GGT TAG GAT TTA CA   |       |       |       |       |              |       |       |       |       |             |       |       |       |  |
| 104. JX244182.1/China/SDLY1/2009 (C4)                                   | GTA TCCC CAC ATT CGGAGA ACACAACAGGAGAAAG ATCTT GAG TAT GGGGCA TGT CC TAA TAA CAT GAT GGG CAC GT TCT CAG TGC GGA CTG TAG GG ACC TCC AAG TCC AAG TAC CC TTT AGT GGT TAG GAT TTA CA   |       |       |       |       |              |       |       |       |       |             |       |       |       |  |
| 105. JF820312.1/China/LCH01/C4/2010 (C4)                                | ATA TCCC CAC ATT CGGAGA ACACAACAGGAGAAAG ATCTT GAA TAT GGGGCA TGT CC TAA TAA CAT GAT GGG TAC GT TCT CAG TGC GGA CTG TAG GG ACC TCC AAG TCC AAG TAC CC TTT AGT GGT TAG GAT TTA CA   |       |       |       |       |              |       |       |       |       |             |       |       |       |  |
| 106. HM002488.1/China/BJ366/2009 (C4)                                   | ATA TCCC CAC ATT CGGAGA ACACAACAGGAGAAAG ATCTT GAA TAT GGGGCA TGT CC TAA TAA CAT GAT GGG TAC GT TCT CAG TGC GGA CTG TGG GG ACC TCC AAG TCC AAG TAC CC TTT AGT GGT TAG GAT TTA CA   |       |       |       |       |              |       |       |       |       |             |       |       |       |  |
| 107. GQ231933.1/Taiwan/TW/70516/08/C4a/2008 (C4)                        | ATA TCCC CAC ATT CGGAGA ACACAACAGGAGAAAG ATATT GAA TAT GGGGCA TGT CC TAA TAA CAT GAT GGG CAC GT TCT CAG TGC GGA CTG TAG GG ACC TCC AAG TCC AAG TAC CC TTT AGT GGT TAG GAT TTA CA   |       |       |       |       |              |       |       |       |       |             |       |       |       |  |
| 108. KC109780.1/China/202/Jingdezhen/China/HFMDSevere/2011/C4/2011 (C4) | ATA TCCC CAC ATT CGGAGA ACACAACAGGAGAAAG ATCTT GAA TAC GGGGCA TGT CC CAA TAA CAT GAT GGG CAC AT TCT CAG TGC GGA CTG TGG GG ACC TCC AAG TCC AAG TAC CC TTT AGT GGT TAG GAT TTA CA   |       |       |       |       |              |       |       |       |       |             |       |       |       |  |
| 109. HM002485.1/China/BJ972008 (C4)                                     | ATA TCCC CAC ATT CGGAGA ACACAACAGGAGAAAG ATCTT GAA TAT GGGGCA TGT CC CAA TAA TAT GAT GGG CAC GT TCT CAG TGC GGA CTG TGG GG ACC TCC AAG TCC AAG TAT CC TTT AGT GGT TAG GAT TTA CA   |       |       |       |       |              |       |       |       |       |             |       |       |       |  |
| 110. GU366191.1/China/Henan/Henan10-08-China/2008/C4a/2008 (C4)         | ATA TCCC CAC ATT CGGAGA ACACAACAGGAGAAAG ATCTT GAA TAT GGGGCA TGT CC TAA TAA CAT GAT GGG CAC GT TCT CAG TGC GGA CTG TGG GG ACC TCC AAG TCC AAG TAC CC TTT AGT GGT TAG GAT TTA CA   |       |       |       |       |              |       |       |       |       |             |       |       |       |  |
| 111. FJ713137.1/Shanghai/Shanghai-036-2009/C4a/2009 (C4)                | GTA TCCC CAC ATT CGGAGA ACACAACAGGAGAAAG ATCTT GAA TAT GGGGCA TGT CC TAA TAA TAT GAT GGG CAC GT TCT CAG TGC GGA CTG TGG GG ACC TCC AAG TCC AAG TAT CC TTT AGT GGT TAG GAT TTA CA   |       |       |       |       |              |       |       |       |       |             |       |       |       |  |
| 112. EU753384.2/China/Shandong/522-04T/SD/CHN/07/C4a/2007 (C4)          | ATA TCCC CAC ATT CGGAGA ACACAACAGGAGAAAG ATCTT GAA TAT GGGGCA TGT CC TAA TAA CAT GAT GGG CAC GT TCT CAG TGC GGA CTG TGG GG ACC TCC AAG TCC AAG TAC CC TTT AGT GGT TAG GAT TTA CA   |       |       |       |       |              |       |       |       |       |             |       |       |       |  |
| 113. HM003207.1/China/87-2008-Xi'an-Shaanxi/2008 (C4)                   | ATA TCCC CAC ATT CGGAGA ACACAACAGGAGAAAG ATCTT GAA TAT GGGGCA TGT CC TAA TAA CAT GAT GGG CAC GT TCT CAG TGC GGA CTG TGG GG ACC TCC AAG TCC AAG TAC CC TTT AGT GGT TAG GAT TTA CA   |       |       |       |       |              |       |       |       |       |             |       |       |       |  |
| 114. EU753365.2/China/Shandong/518-03F/SD/CHN/07/C4a/2007 (C4)          | ATA TCCC CAC ATT CGGAGA ACACAACAGGAGAAAG ATCTT GAA TAT GGGGCA TGT CC TAA TAA CAT GAT GGG CAC GT TCT CAG TGC GGA CTG TGG GG ACC TCC AAG TCC AAG TAC CC TTT AGT GGT TAG GAT TTA CA   |       |       |       |       |              |       |       |       |       |             |       |       |       |  |
| 115. EU753407.2/China/Shandong/TC03F/SD/CHN/07/C4a/2007 (C4)            | ATA TCCC CAC ATT CGGAGA ACACAACAGGAGAAAG ATCTT GAA TAT GGGGCA TGT CC TAA TAA CAT GAT GGG CAC GT TCT CAG TGC GGA CTG TGG GG ACC TCC AAG TCC AAG TAC CC TTT AGT GGT TAG GAT TTA CA   |       |       |       |       |              |       |       |       |       |             |       |       |       |  |
| 116. GQ994988.1/China/Anhui/Anhui1-09-China/C4a/2009 (C4)               | ATA TCCC CAC ATT CGGAGA ACACAACAGGAGAAAG ATCTT GAA TAT GGGGCA TGT CC TAA TAA CAT GAT GGG CAC GT TCT CAG TGC GGA CTG TGG GG ACC TCC AAG TCC AAG TAC CC TTT AGT GGT TAG GAT TTA CA   |       |       |       |       |              |       |       |       |       |             |       |       |       |  |
| 117. JQ708210.1/China/isolateTS/C4/2009 (C4)                            | ATA TCCC CAC ATT CGGAGA ACACAACAGGAGAAAG ATCTT GAA TAT GGGGCA TGT CC TAA TAA CAT GAT GGG CAC GT TCT CAG TGC GGA CTG TGG GG ACC TCC AAG TCC AAG TAC CC TTT AGT GGT TAG GAT TTA CA   |       |       |       |       |              |       |       |       |       |             |       |       |       |  |
| 118. HQ611148.1/China/AH08/06/C4/2008 (C4)                              | ATA TCCC CAC ATT CGGAGA ACACAACAGGAGAAAG ATCTT GAA TAT GGGGCA TGT CC TAA TAA CAT GAT GGG CAC GT TCT CAG TGC GGA CTG TGG GG ACC TCC AAG TCC AAG TAC CC TTT AGT GGT TAG GAT TTA CA   |       |       |       |       |              |       |       |       |       |             |       |       |       |  |
| 119. EU753398.2/China/Shandong/523-07T/SD/CHN/07/2007 (C4)              | ATA TCCC CAC ATT CGGAGA ACATAACAGGAGAAAG ATCTT GAA TAT GGGGCA TGT CC TAA TAA CAT GAT GGG CAC GT TCT CAG TGC GGA CTG TGG GG ACC TCC AAG TCC AAG TAC CC TTT AGT GGT TAG GAT TTA CA   |       |       |       |       |              |       |       |       |       |             |       |       |       |  |
| 120. EU753397.2/China/Shandong/523-05T/SD/CHN/07/C4a/2007 (C4)          | ATA TCCC CAC ATT CGGAGA ACACAACAGGAGAAAG ATCTT GAA TAT GGGGCA TGT CC TAA TAA CAT GAT GGG CAC GT TCT CAG TGC GGA CTG TGG GG ACC TCC AAG TCC AAG TAC CC TTT AGT GGT TAG GAT TTA CA   |       |       |       |       |              |       |       |       |       |             |       |       |       |  |
| 121. JX678882.1/China/Shandong/SD07-1/SD/CHN/2007/C4a/2007 (C4)         | ATA TCCC CAC ATT CGGAGA ACACAACAGGAGAAAG ATCTT GAA TAT GGGGCA TGT CC TAA TAA CAT GAT GGG CAC GT TCT CAG TGC GGA CTG TGG GG ACC TCC AAG TCC AAG TAC CC TTT AGT GGT TAG GAT TTA CA   |       |       |       |       |              |       |       |       |       |             |       |       |       |  |
| 122. EU753375.2/China/Shandong/521-18S/SD/CHN/07/C4a/2007 (C4)          | ATA TCCC CAC ATT CGGAGA ACACAACAGGAGAAAG ATCTT GAA TAT GGGGCA TGT CC TAA TAA CAT GAT GGG CAC GT TCT CAG TGC GGA CTG TGG GG ACC TCC AAG TCC AAG TAC CC TTT AGT GGT TAG GAT TTA CA   |       |       |       |       |              |       |       |       |       |             |       |       |       |  |
| 123. HM002487.1/China/BJ303/2008 (C4)                                   | ATA TCCC CAC ATT CGGAGA ACACAACAGGAGAAAG ATCTT GAA TAT GGGGCA TGT CC TAA TAA CAT GAT GGG CAC GT TCT CAG TGC GGA CTG TGG GG ACC TCC AAG TCC AAG TAC CC TTT AGT GGT TAG GAT TTA CA   |       |       |       |       |              |       |       |       |       |             |       |       |       |  |
| 124. JX678878.1/China/Anhui/FY17.08-7/AH/CHN/2008/C4a/2008 (C4)         | ATA TCCC CAC ATT CGGAGA ACACAACAGGAGAAAG ATCTT GAA TAT GGGGCA TGT CC TAA TAA CAT GAT GGG CAC GT TCT CAG TGC GGA CTG TGG GG ACC TCC AAG TCC AAG TAC CC TTT AGT GGT TAG GAT TTA CA   |       |       |       |       |              |       |       |       |       |             |       |       |       |  |
| 125. JX025561.1/China/FY7VP5/AH/CHN/2008 (C4)                           | ATA TCCC CAC ATT CGGAGA ACACAACAGGAGAAAG ATYTT GAA TAT GGGGCA TGT CC TAA TAA CAT GAT GGG CAC GT TCT CAG TGC GGA CTG TGG GG ACC TCC AAG TCC AAG TAC CC TTT AGT GGT TAG GAT TTA CA   |       |       |       |       |              |       |       |       |       |             |       |       |       |  |
| 126. JQ316638.1/China/HQ09231463/2011 (C4)                              | ATA TCCC CAC ATT TGGAGA ACACAACAGGAGAAAG ATCTT GAA TAC GGGGCA TGT CC TAA TAA CAT GAT GGG CAC GT TCT CAG TGC GGA CTG TGG GG ACC TCC AAG TCC AAG TAC CC TTT AGT GGT TAG GAT TTA CA   |       |       |       |       |              |       |       |       |       |             |       |       |       |  |
